# Supplementary material
Source: publisher figshare collection journal article supplement (https://karger.figshare.com/ndownloader/files/13112519)
Supplement: Supplementary file 1 [file 13112519]

Supplementary Table 1. Medication for more than one year was required. This table contains all 36 dialysis patients, the 25 that were not transplanted as well as the 11 subsequently transplanted patients.

|  | Dialysis patients that suffered from cardiovascular event during or after 2 years of sampling | Dialysis patients with no cardiovascular event during or after 2 years of sampling | Significant difference (p<0.05) |
| --- | --- | --- | --- |
| n | 15 | 21 | NA |
| Year of inclusion | 2003-2010 | 2004-2011 | NA |
| Mean follow up time (years) | 7.4 | 7.7 | n.s. |
| Transplanted patients (n) | 5/15 | 6/21 | n.s. |
| Aspirin treated | 11/15 | 15/21 | n.s. |
| Beta blocker treated | 13/15 | 19/21 | n.s. |
| ACE inhibitor treated | 8/15 | 11/21 | n.s. |
| Angiotensin receptor blocker treated | 6/15 | 14/21 | n.s. (p=0.11) |
